1 **Principal component analysis reveals multiple consistent responses to naturalistic stimuli in**  
2 **children and adults**

3

4 **Running title:** Individual differences in movie watching

5

6 Xin Di, Bharat B. Biswal \*

7

8 Department of Biomedical Engineering, New Jersey Institute of Technology, Newark, NJ, 07102, USA

9

10 \* Corresponding author:

11 Bharat B. Biswal, PhD

12 607 Fenster Hall, University Height

13 Newark, NJ, 07102, USA

14 bbiswal@yahoo.com

15

16 **Acknowledgment:**

17 This study was supported by grants from the National Institute of Health, United States (R01 AT009829;

18 R01 DA038895).

19 **Abstract**

20 Functional MRI (fMRI) study of naturalistic conditions, e.g. movie watching, usually focuses on shared  
21 responses across subjects. However, individual differences have been attracting increasing attention in  
22 search of group differences or associations with behavioral outcomes. Individual differences are typically  
23 studied by directly modeling the pair-wise intersubject correlation matrix or projecting the relations onto a  
24 single dimension. We contend that it is critical to examine whether there are one or more consistent  
25 responses underlying the whole sample, because multiple components, if exist, may undermine the  
26 intersubject relations using the previous methods. We propose to use principal component analysis (PCA)  
27 to examine the heterogeneity of brain responses across subjects and project the individual variability into  
28 higher dimensions. By analyzing an fMRI dataset of children and adults watching a cartoon movie, we  
29 showed evidence of two consistent responses in the supramarginal gyrus and other regions. While the  
30 first components in many regions represented a response pattern mostly in older children and adults, the  
31 second components mainly represented the younger children. The second components in the  
32 supramarginal network resembled a delayed version of the first PCs for 4 seconds (2 TR), indicating  
33 slower responses in the younger children than the older children and adults. The analyses highlight the  
34 importance of identifying multiple consistent responses in responses to naturalistic stimuli. This PCA-  
35 based approach could be complementary to the commonly used intersubject correlation to analyze movie  
36 watching data.

37

38 **Keywords:** development; individual difference; naturalistic condition; principal component analysis;  
39 supramarginal gyrus; theory of mind; movie watching

## 40 **1. Introduction**

41 Neuroimaging study of brain functions has observed a paradigm shift from using well-controlled  
42 experimental tasks or completely unconstrained resting-state to using more naturalistic and complex  
43 stimuli such as movies and stories (Hasson et al., 2004; Nastase et al., 2019; Sonkusare et al., 2019).  
44 Compared with the resting-state, the naturalistic condition is more confined to the inputs, which could  
45 ensure that different subjects follow similar brain states. On the other hand, the stimuli are more  
46 naturalistic than arbitrarily defined trials and tasks, and maybe more efficient to elicit higher-order brain  
47 functions. When watching or listening to the same naturalistic stimuli, different subjects tend to have  
48 similar brain responses in certain brain regions (Hasson et al., 2004), which can be examined by using  
49 intersubject correlations (Chen et al., 2016; Nastase et al., 2019).

50 In addition to the study of shared responses, a growing research interest has begun focusing on  
51 the individual differences of responses during naturalistic conditions (Chen et al., 2017; Finn et al., 2020).  
52 Differences in shared responses have been shown between children and adults (Cantlon and Li, 2013;  
53 Moraczewski et al., 2018; Petroni et al., 2018), during aging (Campbell et al., 2015), as well as in mental  
54 disorders, such as autism spectrum disorder (Byrge et al., 2015; Hasson et al., 2009; Salmi et al., 2013)  
55 and schizophrenia (Yang et al., 2019). Within a healthy subject group, the intersubject correlations of  
56 brain responses were also correlated with the similarities of subjective ratings of the stimuli (Jääskeläinen  
57 et al., 2016; Nummenmaa et al., 2012), and subjects' trait-like characteristics such as paranoia (Finn et al.,  
58 2018) and cognitive style (Bacha-Trams et al., 2018).

59 The methods for studying the individual differences in responses to naturalistic stimuli is still  
60 being developed (Chen et al., 2017; Finn et al., 2020). For a given brain region (or voxel), each subject  $i$   
61 has a response time series  $x_i(t)$ , which can be partitioned into three components (Nastase et al., 2019):

$$62 \quad x_i(t) = c(t) + id_i(t) + \varepsilon_i(t) \quad (1)$$

63 where  $c(t)$  represents the consistent response across subjects,  $id_i(t)$  represents the idiosyncratic response  
64 for each subject  $i$ , and  $\varepsilon(t)$  represent noises. The idiosyncratic response  $id_i(t)$  ideally is unique to each  
65 subject, therefore it is usually referred to as the source of individual differences. This is true by its

66 definition. However, if everyone has different responses, it is difficult to link the responses to individual  
67 measures or group differences. In a real case scenario, it is usually assumed that there is a underlying  
68 canonical responses pattern (Finn et al., 2020), which is present across subjects but weights differently for  
69 individuals. The model can then be modified with an additional weight parameter  $a_i$ :

$$70 \quad x_i(t) = a_i \cdot c(t) + id_i(t) + \varepsilon_i(t) \quad (2)$$

71 The estimates of  $a_i$  can then be used to correlate with group or individual differences. Here the model is  
72 different from Finn et al. (Finn et al., 2020) because they added the weight parameter to the idiosyncratic  
73 term  $id(t)$  rather than  $c(t)$ . But essentially the two models are the same because they both assume an  
74 underlying canonical response, and individual differences arise from the weightings.

75 A straightforward way to obtain  $a_i$  for is to first estimate the consistent component  $c(t)$ , and  
76 correlate each subject's time series  $x_i(t)$  with  $c(t)$ .  $c(t)$  is usually calculated by excluding the examined  
77 subject and averaging the remaining subjects to avoid bias, a strategy also known as leave-one-out (LOO)  
78 (Nastase et al., 2019). An alternative strategy is to calculate a pairwise intersubject correlations matrix,  
79 which projects  $a_i$  into two dimensions. The differences between pairs of subjects can be compared by  
80 using linear mixed-effect modeling (Chen et al., 2017). Moreover, a few models have been proposed to  
81 translate individuals' behavioral measures into pair-wise relationships, e.g. Nearest Neighbors model and  
82 *Anna Karenina* model (Finn et al., 2020). The pair-wise relations in brain activity measures and those in  
83 behavioral measures can then be correlated to verify which model can best describe the intersubject  
84 relationships.

85 There are two main limitations in the current methods. First, the representational similarity  
86 approach depends on the hypothesis of the relationships. For example, *Anna Karenina* model assumes  
87 that the subjects with higher scores of a behavioral measure tend to have similar responses, but those with  
88 lower scores all respond differently. A model may not be appropriate for certain domains, and may not be  
89 able to capture complex relationships such as a non-monotonic developmental curve. Secondly, it is  
90 usually implicitly assumed that there is only one consistent component. But this may not be true in a real  
91 case scenario. For example, children may comprehend a cartoon movie differently from adults, or males

92 and females may pay attention to different scenes and objects. Therefore, we may need to assume  
93 multiple consistent components among all the subjects. Equation 2 can then be expanded to include two  
94 consistent components  $c_1(t)$  and  $c_2(t)$ :

$$95 \quad x_i(t) = a_i \cdot c_1(t) + b_i \cdot c_2(t) + id_i(t) + \varepsilon_i(t) \quad (3)$$

96 Now there are two sets of parameters to represent individual differences,  $a_i$  and  $b_i$ . LOO correlation  
97 method cannot recover both sets of the parameters. And the pair-wise correlation matrix may also be  
98 difficult to capture using simple models such as *Anna Karenina* model.

99 We take development as an example. A certain function may start to develop after a certain age  
100 and then reach a plateau. If the function requires a certain pattern of brain responses, then the weight  
101 parameters  $a_i$  for that response will look like Figure 1A. A developmental curve may also like Figure 1B,  
102 where the likelihood to respond to a certain pattern first increases and then decreases as age increases.  
103 Figure 1D and 1E show the pair-wise intersubject correlations for the two developmental curves. Matrix  
104 1D can be described by *Anna Karenina* model. But new models are needed to describe the relationships  
105 in matrix 1E. Alternatively, we can calculate LOO intersubject correlations, and the individual LOO  
106 correlations can reflect the hypothetical developmental trends (Figure 1G and 1H). A more complex  
107 scenarios is that the two consistent components may both exist and they are independent (Figure 1C).  
108 The pair-wise correlations become more complicated to be modeled (Figure 1F). And the LOO  
109 correlations can only show an averaged age effect, but cannot recover the two separate trends (Figure 1I).

110

111 [Insert Figure 1 about here]

112

113 To untangle the complex intersubject relationships, we proposed a principal component analysis  
114 (PCA) based analysis strategy. The time series of all the subjects form a matrix  $X$  (time points x subject).  
115 PCA identifies a transformation matrix  $W$  to transform the individual response matrix  $X$  into a series of  
116 principal components (PCs)  $T$ :

$$117 \quad T = X \cdot W \quad (4)$$

118 The PCs are all orthogonal. The first PC explains the largest variance of the data, and the remaining PCs  
119 similarly maximize the explained variance of the remaining variance. The variance explained by each PC  
120 is indexed by the eigenvalue of the covariance matrix of  $X$ , which could be an indicator of whether there  
121 are multiple consistent response patterns. In the first two hypothetical developmental functions, a single  
122 component explained a large portion of variance (Figure 1J and 1K). In contrast, in the third case with  
123 two consistent responses, the first two components both explained large portions of variance (Figure 1L).

124 Usually, we are only interested in the first few PCs. For the  $i^{\text{th}}$  PC, its relations to individuals'  
125 time series are as follow:

$$126 \quad t_i = X \cdot w_i \quad (5)$$

127 If we assume the first or second PCs as consistent responses, then the weight vector  $w_i$  may reflect the  
128 weight of each subject on the consistent responses. We calculated the loadings of the first PCs for the  
129 first two hypothetical developmental functions, and the loadings showed similar patterns as the  
130 developmental functions and the individual LOO correlations (Figure 1M and 1N). Moreover, the  
131 loadings of the first two PCs from the third scenario can differentiate the developmental patterns of the  
132 two consistent components (Figure 1O).

133 The study of group differences, e.g. a case-control study, also faces a similar problem. For  
134 example, we may expect that a group of subjects with a mental disorder have lower intersubject  
135 correlations. On the other hand, all healthy subjects might have consistent responses. But the critical  
136 question becomes whether the patient group has diminished responses at all or has a different canonical  
137 response from those in the healthy group. One can compare pair-wise intersubject correlations between  
138 groups to answer this question (Chen et al., 2017, 2016). But it could be overlooked if one only used the  
139 LOO-based method.

140 In summary, we have briefly reviewed the methods for studying individual differences in  
141 response to naturalistic stimuli. We argue that it is critical to examine whether there are multiple  
142 consistent components. We therefore propose a PCA-based approach to first indicate whether there are  
143 potentially multiple consistent components, and then examine individual loadings of these components.

144 Age and biological sex are two common factors that affect the individual differences in brain structures  
145 and functions (Dosenbach et al., 2010; Lenroot et al., 2007). By using the movie-watching paradigm, two  
146 previous studies have shown higher intersubject correlations in adults compared with children (Cantlon  
147 and Li, 2013; Moraczewski et al., 2018). In the current study, by analyzing another publicly available  
148 fMRI dataset of children and adults who watched an animated movie, we ask whether there are multiple  
149 consistent response patterns in the sample. We applied our PCA-based approach and showed evidence of  
150 second consistent components in certain brain regions. We also examined the relations between the PCA-  
151 based approach and the commonly used LOO correlations in the real fMRI data.

152

## 153 **2. Materials and methods**

### 154 **2.1. Data and task**

155 The fMRI data were obtained through openneuro (<https://openneuro.org/>), with accession #: ds000228.  
156 There are in total of 155 subjects, with 33 adults (18 to 39 years old) and 122 children subjects (3 to 12  
157 years old). We adopted the same criteria to remove data with poor spatial coverage and large head  
158 motion (see below) as our previous paper with only adult subjects analyzed (Di and Biswal, 2020). As a  
159 result, the adult group included 17 females and 12 males. The age range was 18 to 39 years old (*mean* =  
160 *24.6*, *standard deviation* = *5.3*). The children group included 28 females and 25 males. The age range  
161 was 3.5 to 12.3 years old (*mean* = *7.0*, *standard deviation* = *2.5*). The original study was approved by the  
162 Committee on the Use of Humans as Experimental Subjects (COUHES) at the Massachusetts Institute of  
163 Technology.

164 During the fMRI scan, the subjects watched a silent version of the Pixar animated movie “Partly  
165 Cloudy”, which is 5.6 minutes long (<https://www.pixar.com/partly-cloudy#partly-cloudy-1>). Brain MRI  
166 images were acquired on a 3-Tesla Siemens Tim Trio scanner. Younger children were scanned using one  
167 of two 32-channel custom head coils, and older children and adults were scanned using the standard  
168 Siemens 32-channel head coil. Functional images were collected with a gradient-echo EPI sequence  
169 sensitive to blood-oxygen-level dependent (BOLD) contrast in 32 interleaved near-axial slices (EPI factor:

170 64; TR: 2 s, TE: 30 ms, flip angle: 90°). The subjects were recruited for different studies with slightly  
171 different voxel size and slice gaps, 1) 3.13 mm isotropic with no gap; 2) 3.13 mm isotropic with 10%  
172 gap; 3) 3 mm isotropic with 20% gap; and 4) 3 mm isotropic with 10% gap). During the preprocessing,  
173 all the functional images were resampled to 3 mm isotropic voxel size. 168 functional images were  
174 acquired for each subject, with four dummy scans collected before the real scans to allow for steady-state  
175 magnetization. T1-weighted structural images were collected in 176 interleaved sagittal slices with  
176 1 mm isotropic voxels (GRAPPA parallel imaging, acceleration factor of 3; FOV: 256 mm). For more  
177 information on the dataset please refers to (Richardson et al., 2018).

178

## 179 **2.2. FMRI data processing**

### 180 **2.2.1. Preprocessing**

181 FMRI data processing and analyses were performed using SPM12 (SPM: RRID:SCR\_007037;  
182 <https://www.fil.ion.ucl.ac.uk/spm/>) and MATLAB (R2017b) scripts. A subject's T1 weighted structural  
183 image was first segmented into gray matter, white matter, cerebrospinal fluid, and other tissue types, and  
184 was normalized into standard Montreal Neurological Institute (MNI) space. The T1 images were then  
185 skull stripped based on the segmentation results. Next, all the functional images of a subject were  
186 realigned to the first image and coregistered to the skull stripped T1 image of the same subject.  
187 Framewise displacement was calculated for the translation and rotation directions for each subject (Di and  
188 Biswal, 2015). Subjects who had maximum framewise displacement greater than 1.5 mm or 1.5° were  
189 discarded from further analysis. The functional images were then normalized to MNI space using the  
190 parameters obtained from the segmentation step with a resampled voxel size of 3 x 3 x 3 mm<sup>3</sup>. The  
191 functional images were then spatially smoothed using a Gaussian kernel of 8 mm. Lastly, a voxel-wise  
192 general linear model (GLM) was built for each subject to model head motion effects (Friston's 24-  
193 parameter model) (Friston et al., 1996), low-frequency drift via a discrete cosine basis set (1/128 Hz  
194 cutoff), and a constant offset. The residuals of the GLM were saved as a 4-D image series, which were  
195 used for further intersubject correlation analysis.



196           Regarding the potential head motion effects, we firstly calculated framewise displacement in  
197 translation and rotation separately (Di and Biswal, 2015), and removed subjects with maximum  
198 framewise displacement greater than 1.5 mm or 1.5°. As a result, 82 subjects were included in the final  
199 analysis. Secondly, we performed PCA on the framewise displacement time series in translation and  
200 rotation. The first components explained 4.66% and 4.30% of the variance in the two directions,  
201 respectively, suggesting that there were very limited intersubject correlations of head movements across  
202 subjects (also see Supplementary Figure S1). Thirdly, in preprocessing 24 head motion variables have  
203 been removed from the fMRI time series. Lastly, we calculated mean framewise displacement in  
204 translation and rotation for each subject. The children group showed significant larger mean framewise  
205 displacement in rotation compared with the adult group ( $t = 6.04, p < 0.001$ ) (see Supplementary section  
206 S1 for details). In later analyses considering age effects or behavioral correlations, we regressed out the  
207 mean framewise displacements in translation and rotation from the PC loadings and compared the results  
208 before and after the regression.

209

## 210 **2.2.2 Dimension reduction**

211 We first focused on a small number of large-scale networks, which enabled us to perform an in-depth  
212 analysis of their time courses and individual variations. We performed spatial independent component  
213 analysis (ICA) to define large-scale networks by using Group ICA of fMRI Toolbox (GIFT:  
214 RRID:SCR\_001953; <http://mialab.mrn.org/software/gift>) (Calhoun et al., 2001). Twenty components  
215 were extracted. The resulting IC maps were visually inspected, and fifteen maps were included in the  
216 subsequent analysis as functionally meaningful brain networks. The full maps of all the 20 ICs can be  
217 found at: <https://neurovault.org/collections/INSJUAIW/>. For each IC, a time series was back-  
218 reconstructed to each subject using the group ICA method, resulting in a 168 (time points) x 82 (subject)  
219 matrix. To avoid confusion with PCA in the current paper, we refer to the IC maps as networks below.  
220 Secondly, we performed PCA on a voxel basis to study the spatial distributions.

221

### 222 **2.3. Principal component analysis**

223 For each network (IC) or voxel, we performed PCA on a 168 (time points) x 82 (subject) matrix  $X$ . The  
224 time series of each subject (each column) was first z transformed, which is a critical step in PCA. Then,  
225 PCA was performed in MATLAB by using the singular value decomposition algorithm. The eigenvalues  
226 of the covariance matrix of  $X$  were obtained. The percentage variance explained by each PC was then be  
227 calculated as the corresponding eigenvalue divided by the sum of all the eigenvalues. The PC scores  
228 (time series) and the associated weighting for each subject  $w_i$  were also obtained. PC loadings were  
229 calculated as the PC weights multiplying the standard deviation of the eigenvalue.

230 To determine whether a PC explained greater variance than the random level, we performed a  
231 circular time-shift randomization to determine the null distributions (Kauppi et al., 2010). The time-shift  
232 method can preserve the autocorrelations in the BOLD time series, which is preferable to a simple  
233 permutation test. Specifically, each subject's time series were added a delay drawn from a discrete  
234 uniform distribution of 0 to 167 with replacement, then the PCA was performed, and the variances  
235 explained by the first PC was obtained. The process was repeated 10,000 times to form a null distribution.  
236 The variances explained by the first two PCs from the real fMRI data were compared with the null  
237 distributions to obtain the p values. It is noteworthy that the null distributions were calculated based on  
238 the first PC, which is a conservative choice for the statistics of the second PCs.

239 For the ICA-based analysis, we performed the circular time-shift randomizations for every  
240 network (ICs). We adopted a threshold of  $p < 0.001$  to account for the multiple comparisons. An  
241 alternative approach is to use false discovery rate (FDR) correction. However, FDR depends on the  
242 overall distributions of all the regions. It may make the thresholding different among different spatial  
243 scales. We therefore adopt the same threshold of  $p < 0.001$  for the ICA-based and voxel-wise analyses,  
244 which was more stringent than FDR corrected  $p < 0.05$  in the current case. The randomization was quite  
245 computationally expensive for the voxel-wise analysis. Therefore, we performed PCA on 1,000 regions  
246 (Schaefer et al., 2018) and calculated the local null distributions. The voxel-wise PCA results were  
247 compared with the null distribution in a local region to compute the p values.

248           Because the later PCs may represent only a small number of subjects, we evaluated whether the  
249 PCs could be reliability identified with sample variations. We performed bootstrapping along the subject  
250 dimension for 1,000 times. PCA was performed on the bootstrapping samples, and the correlations of the  
251 PCs were calculated among the samples. The goal is to verify whether the identified PCs were consistent  
252 across the bootstrapping samples. The 95% confidence interval of the variance explained by the second  
253 PCs were also obtained. This analysis was only performed for the ICA-based analysis.

254

#### 255 **2.4. Cross-correlation and delay estimates**

256           Because we found that the second PC score in some networks seemed to be delayed to the first PC, we  
257 calculated cross-correlations between the two PC scores to confirm this. The autocorrelation in BOLD  
258 signals could produce spurious cross-correlations (Dean and Dunsmuir, 2016), therefore, we performed  
259 simulations with components of convolution with hemodynamic response function (HRF). Specifically,  
260 we generated two Gaussian time series with 168 time points and convolved them with the canonical HRF  
261 in SPM. Cross-correlations were then calculated, and the maximum absolute value of the cross-  
262 correlations was obtained. The procedure was repeated 100,000 times to form a null distribution of the  
263 maximum value. The 95 percentile of the distribution was used as the critical value for the cross-  
264 correlation analysis for the real fMRI data.

265           We also calculated the time lags between the time series of every subject with reference to the  
266 first PC score by obtaining the time point of maximum absolute cross-correlation. Because single subject  
267 time series were noisy, we set a maximum lag of  $\pm 5$  time points in search of lags.

268

#### 269 **2.5. Behavioral correlates**

270           We next asked whether the first two PCs of different networks can provide complementary information in  
271 explaining the variability of a behavioral measure. Test scores of theory of mind performance are  
272 available for the children subjects ( $n = 53$ ). The theory of mind battery includes custom-made stories and  
273 questions that require an understanding of the characters' mental states. The theory of mind task

274 performance was summarized as the proportion of correct questions out of the 24 items. More  
275 information about the task and scores can be found in Richardson et al. (2018). The analysis was only  
276 performed for the ICA-based analysis, where the second PC explained significant variance (i.e. the  
277 supramarginal network). We first examined simple correlations between the first or second PC loadings  
278 and the theory of mind performance. Next, we put the two PC loadings together in a linear regression  
279 model to explain the variance of the theory of mind performance. The t statistics corresponding to the  
280 two PC loading regressors were obtained.

281

## 282 **2.6. LOO correlation and the relations to PCA-based method**

283 Although the main focus of this study is to apply PCA to identify potentially multiple consistent  
284 responses, PCA can also provide measures on intersubject correlations. Specifically, we asked whether  
285 the variance explained by the first PC is related to the averaged intersubject correlations and whether the  
286 loadings of PC1 are related to the individual LOO correlations. For a specific region, we calculated LOO  
287 intersubject correlations on the 168 (time points) x 82 (subject) matrix  $X$ . Specifically, a subject's time  
288 series was held out and the consistent component was calculated by averaging the remaining 81 subjects.  
289 Then the correlation between the subject's time series and the averaged time series was calculated. Each  
290 subject then had a LOO correlation value. The LOO correlations were Fisher's z transformed, averaged,  
291 and then transformed back to r values to form an averaged intersubject correlation in a region.

292 We first examine the relationships on all the 20 networks (ICs). The averaged intersubject  
293 correlations were squared to match with the variance quantity. We then calculated the correlations  
294 between the variance explained by the first PC and the squared mean correlations across the 20 networks.  
295 Next, for each network, we calculated the correlations between the first PC loadings and individual LOO  
296 correlations. The same analysis was performed on the 1,000 ROIs.

297 The rationale for including the noise ICs in the analysis is to reveal more general relations  
298 between PCA and LOO correlations. Imagine if all the time series are noise, given the high  
299 dimensionality (number of subjects), then the first PC may not be identified as the averaged time series.

300 But if there are underlying consistent signals, then the first PC may turn out to be very similar to the  
301 averaged time series, i.e. the consistent response. This will in turn give rise to high correlations between  
302 PC1 loadings and individual LOO correlations. We performed a simple simulation to reveal such a  
303 relationship. We generated a 168 x 82 matrix with a 168 Gaussian vector representing the consistent  
304 response and a 168 x 82 Gaussian random matrix representing the noises. The consistent component had  
305 different weights for subjects drawn from a uniform distribution between 0 and 1. And finally, the  
306 subjects' weights were multiplied by an overall weight value from a uniform random distribution (from 0  
307 to 1) to vary the overall levels of intersubject correlations. The procedure was repeated 1,000 times. We  
308 then calculated PCA and LOO correlations and examined their relations.

309

310

### 311 **3. Results**

#### 312 **3.1. ICA-based analysis**

313 We first performed PCA on the 15 large-scale networks and obtained the percentage of variances  
314 explained by the PCs (Figure 2). The first PCs of all the 15 networks explained more than chance-level  
315 variance at  $p < 0.001$ . Among the 6 networks that explained the highest variance (more than 15%), five  
316 were visual related networks and the remaining IC 17 was located in the supramarginal gyrus. These are  
317 consistent with our previous voxel-wise analysis in only adult subjects (Di and Biswal, 2020). For the  
318 second PCs, only the supramarginal network (IC17) explained more than chance-level variance ( $6.01\%$ ,  $p$   
319  $< 0.001$ ). Supplementary Figure S4 shows the variance explained by all the PCs in this network. It is  
320 noteworthy that the variance explained by the second PC would be much less than those explained by the  
321 first one. But it may be still meaningful, because the differences may reflect the number of subjects  
322 represented in different PCs. To evaluate the stability of the PC2, we performed a bootstrapping along  
323 the subject dimension. Supplementary Figure S5A and S5B show that PC2 could be reliability identified  
324 among the bootstrapping samples. And the 95% confidence interval of the explained variance by PC2  
325 was between  $5.65\%$  and  $7.50\%$ .

326

327

[Insert Figure 2 about here]

328

329           The pair-wise correlation matrix in the supramarginal network clearly showed a trend of greater  
330 intersubject correlations in older subjects (Figure 3A). The PC1 loadings were mostly positive and were  
331 greater as age increased and reached a plateau during the adult age range. In contrast, the PC2 loadings  
332 were positive for the younger children but mostly negative for the adults. No clear sex differences can be  
333 found in both PCs. We also calculated the LOO intersubject correlations (Figure 3D), which turned out to  
334 be very similar to the PC1 loadings ( $r \approx 1$ ,  $p < 0.001$ , see also the scatter plot in supplementary Figure S6).  
335 The mean framewise displacement in rotation showed small but statistically significant correlations with  
336 both PC1 loading ( $r = -0.30$ ,  $p = 0.007$ ) and PC2 loading ( $r = 0.29$ ,  $p = 0.009$ ). We therefore regressed  
337 out the mean framewise displacements from the two PC loadings. The age effects on the adjusted PC  
338 loadings remain very similar to what on the original PC loadings (Figure S2).

339

340

[Insert Figure 3 about here]

341

342           Figure 4A shows the time series of the first two PCs (PC scores) in the supramarginal network.  
343 Interestingly, PC2 looked similar to PC1 but seemed delayed compared with the PC1. Cross-correlation  
344 analysis confirmed a 2-TR (4 s) delay between them (Figure 4B). Further, we examined whether the  
345 loadings of the PC2 reflect the lags of an individual's time series. We calculated the time shifts between  
346 each individual's time series with reference to the PC1 time series. 80 out of the 82 subjects had a -1 to 1  
347 time points shifts. The individual's time shifts related to PC1 were highly correlated with the PC2  
348 loadings (Figure 4C). In Supplementary Figure S8, we show individual time series with subjects ordered  
349 according to age (top row) and the PC2 loadings (bottom row). It shows clearly that for older subjects the  
350 time series appeared to be faster compared with the younger subjects. The time lags became clearer when  
351 the subjects were sorted by the PC2 loadings.

352

353

[Insert Figure 4 about here]

354

355

356

357

358

359

360

361

362

363

364

365

366

367

368

[Insert Figure 5 about here]

369

370

### **3.2. Spatial distributions of variances explained by the second PCs**

371

372

373

374

375

376

The left panel of Figure 6 shows the spatial distributions of significant second PCs at  $p < 0.001$ . For reference, the PC1 variance map is shown in the right panel. One major cluster of the PC2 map covered the supramarginal gyrus and extended to the posterior parietal lobe and posterior visual regions. We further increased the threshold to 5% to break it into three small clusters, including two clusters covering the left and right supramarginal gyrus and one cluster in posterior visual areas. We extracted the averaged time series in these clusters and performed PCA. The first two PC loadings in the three clusters were very

377 similar to those of the supramarginal network (IC 17), i.e. the first PC loadings reflected a maturation age  
378 effect and the second PC loadings reflected higher weights in younger children.

379

380 [Insert Figure 6 about here]

381

382 Outside the major cluster, there were three clusters larger than 40 voxels at  $p < 0.001$ , including  
383 the precuneus and left and right sensorimotor regions. The precuneus, which is part of the default mode  
384 network, is particularly interesting given its role in theory of mind processing (Richardson et al., 2018).  
385 The first two PCs and their loadings of the precuneus are shown in Figure 7. Similar to the supramarginal  
386 network (IC 17), the first PC loadings showed a maturation age effect and the second PC loadings had  
387 higher weights in younger children. The PC2 time series also seemed to be a delayed version of PC1 but  
388 with a 2-TR (4 s) lag (Figure 7A and 7D).

389

390 [Insert Figure 7 about here]

391

392 The left and right sensorimotor regions had very similar time courses and age effects. Figure 8  
393 shows the left sensorimotor region as an example. In contrast to the previous networks and regions, the  
394 PC1 loadings of the left sensorimotor region first increased with age in the children group, but decreased  
395 with age in the adult group. Conversely, the PC2 loadings had higher weights in the adult group. The  
396 cross-correlation between PC1 and PC2 also had maximum correlation at 2-TR (4 s) lag, but PC2 was 2-  
397 TR in advance. Because PC1 had large weights in younger subjects and PC2 had larger weights in older  
398 subjects and PC, the cross-correlation indicated that the older group had a faster brain activity compared  
399 with the younger group, which is consistent with the previous networks and regions. Lastly, the age  
400 effects of the PC loadings were not confounded by the head motions. When regressing out framewise  
401 displacement from the PC loadings, the age effects remained very similar (Supplementary Figure S3).

402



403 [Insert Figure 8 about here]

404

405

### 406 **3.3. Relations to LOO correlations**

407 Lastly, we asked whether the PCA-based measures are related to the commonly used intersubject  
408 correlation measures. Among the 20 networks (ICs) and the 1,000 ROIs, we found almost perfect linear  
409 relations between the squared mean intersubject correlations and the percentage of variance explained by  
410 the first PCs (Figure 9A and 9B). However, their relations were off the  $y = x\%$  line, suggesting that their  
411 quantities were not directly comparable. A similar relation can be found in the simulations (Figure 9C).

412

413 [Insert Figure 9 about here]

414

415 As expected, we found that the correlations between PC1 loadings and individual LOO  
416 correlations are related to the noise level of a region. We therefore plotted the correlations against the  
417 variance explained by the first PC in a network (Figure 9D) and ROI (Figure 9E). We found that if the  
418 variance explained by the first PC were higher than 5%, i.e. there are likely underlying consistent  
419 responses, then the correlations between the PC1 loadings and individual LOO correlations were higher  
420 than 0.95. But if there were very low variance explained by the first PC, then the correlation could drop  
421 to 0.5. The two networks with low correlations in Figure 9D were both considered noise components,  
422 which were excluded in the current analysis. Such a relationship was confirmed by the simulation data  
423 (Figure 9F). The simulation results further showed that in noisy conditions the correlations between PC1  
424 loadings and individual LOO correlations varied in a wide range. But if there were underlying consistent  
425 signals, then their correlations could be close to 1. In supplementary Figure S9, we further show that the  
426 correlations between PC1 loadings and LOO correlations were related to whether PC1 could capture the  
427 averaged signals. In other words, the higher the correlations between PC1 and averaged signals, the  
428 higher the correlations between PC1 loadings and LOO correlations.

429

430

#### 431 **4. Discussion**

432 In the current paper, we proposed a PCA-based framework to study the individual differences in response  
433 to naturalistic stimuli in fMRI data. On a movie watching dataset of children and adults, we showed  
434 evidence of second PCs in distributed brain regions, which may represent a second consistent response to  
435 the movie in the tested sample. The two PCs showed different distributions in age but not in biological  
436 sex, suggesting that the two consistent responses represent different age groups. The regions that showed  
437 the second consistent responses were in the supramarginal gyrus, posterior parietal lobe, visual areas, the  
438 precuneus, and sensorimotor regions. Interestingly, in the supramarginal gyrus, the second PC  
439 represented delayed responses than the first PC for 4 seconds (2 TR), suggesting the children around 5  
440 years old may have delayed response compared with the adults. The results indicate the importance of  
441 studying potentially multiple consistent responses in large samples.

442 By calculating the eigenvalues of the covariance matrix, we provided evidence of potentially  
443 multiple consistent responses in the sample, which cannot be identified by using intersubject correlations.  
444 It is noteworthy that the variance explained by the second PCs in the current study were around 5% to 6%,  
445 which were much smaller than those by the first PCs. It may reflect the fact that the second PCs only  
446 represented a small number of subjects, but not that the correlations among them were lower. By using  
447 bootstrapping on the subject dimension, we showed that the second PC in the supramarginal gyrus were  
448 reliable against subject sampling, which support the former interpretation. As the sample sizes in  
449 neuroimaging studies become larger and larger, it becomes more important to identify sub-groups of  
450 subjects with distinct but consistent responses from other subjects. PCA provides an unsupervised tool to  
451 visualize and identify the potential sub-groups.

452 The regions that showed evidence of a second consistent components included the supramarginal  
453 gyrus, the posterior parietal lobe, higher visual areas, the precuneus, and sensorimotor regions. Except for  
454 the sensorimotor regions, the other regions seemed to follow similar subject weightings. That is, the first

455 PC represented an increasingly similar response as age increased, and the second PC represented a higher  
456 similar response in children around age 5. These all suggest that the children around 5 years old showed a  
457 unique pattern of brain responses compared with both the adults and the other children groups.

458 The supramarginal network is a critical region involving in the theory of mind process (Silani et  
459 al., 2013) and the understandings of others' pain (Bruneau et al., 2015). In the current results, the  
460 loadings of both PC1 and PC2 were correlated with the theory of mind performance, further confirmed its  
461 role in the understanding of the movie. Interestingly, we found that the PC2 seemed to be a delayed  
462 version with reference to the PC1, and the PC2 loadings could reflect the delays of an individual's time  
463 series. This suggests a multivariate nature of functional developments in this region. For the youngest  
464 children in this sample, theory of mind has not been fully developed. The functional responses in the  
465 supramarginal gyrus did not show similarity among each other, nor with the older children or adults. For  
466 the children around 5 years old, the theory of mind ability has started developing, but the brain responses  
467 may be less reliable and slower compared with adults. As growing older, the responses becomes more  
468 reliable and similar to the adults. A study using the same movie stimuli has shown that when the movie  
469 was shown the second time to children of 6-7 years old, the responses shifted earlier than those from the  
470 first presentation (Richardson and Saxe, 2020), further support that the brain response time may reflect  
471 the ability of the understanding the movie.

472 One consideration related to the delays in BOLD signals is the inherent autocorrelation (Friston et  
473 al., 2000, 1994). Usually, the BOLD signals have a high autocorrelation at 1-TR (2 s) lag, and remain a  
474 small autocorrelation at 2-TR (4 s) lag. This means that if the delays are with 2 seconds, then PCA  
475 probably will not able to identify two distinguished components. Moreover, PCA forces the latter PCs to  
476 be orthogonal to the former PCs, meaning the signals related to PC1 have been removed from PC2. This  
477 may make PC2 look spikier than PC1. In other words, PC2 doesn't simply represent one particular group  
478 of subjects, but those after considering the PC1 effects. One can think of PC2 as a higher-order deviation  
479 to PC1 that captures certain individual variations in the sample.

480 In the voxel-wise analysis, we observed distributed regions in the posterior parietal lobe, higher  
481 visual areas, the precuneus, and sensorimotor regions who showed evidence of second consistent  
482 components. The precuneus is particularly interesting given its role in theory of mind processing  
483 (Richardson et al., 2018). The other regions may be related to attention and sensorimotor processing.  
484 Previous studies have suggested that children and adults activate different brain regions when watching  
485 real versus cartoon movies (Han et al., 2007, 2005). They found that the medial prefrontal cortex was  
486 activated in children but not adults when watching cartoon movies. Although the regions identified are  
487 different, all the studies have suggest different brain response patterns between children and adults.

488 PCA is an unsupervised approach that relaxes the assumptions on the interindividual relationships.  
489 It is particularly useful for continuous variables such as age, where the exact timing of developments may  
490 be unknown or the developmental effects may not be monotonic. Two previous studies have compared  
491 the pair-wise intersubject correlations between children and adults and found reduced intersubject  
492 correlations in children (Cantlon and Li, 2013; Moraczewski et al., 2018). These were done by defining  
493 specific age groups. When using the PCA-based approach or LOO-based approach (Campbell et al.,  
494 2015), age can be treated as a continuous variable, so that the age effects can be modeled as  
495 developmental trajectories. On the other hand, when using the intersubject representational similarity  
496 analysis approach (Finn et al., 2020), the age effect may be captured by *Anna Karenina* model, where  
497 only older subjects respond more similarly to each other. But this model cannot capture a non-monotonic  
498 age effect, nor different consistent responses. One may need to develop new models to capture complex  
499 age effects when using the representational similarity approach.

500 In addition to the information about multiple consistent components, PCA can also provide  
501 similar information as LOO intersubject correlations. The variance explained by the first PC is a similar  
502 measure as averaged intersubject correlations. The current results showed that across brain regions the  
503 variance explained by the first PC was almost perfectly correlated with the averaged intersubject  
504 correlations. Moreover, the loadings of the first PC provide a simple way to project the consistent  
505 response to an individual's dimension, which is easier than correlating each subject's time series with the

506 LOO averaged time series (Nastase et al., 2019). The current results showed very high correlations  
507 between PC1 loadings and LOO intersubject correlations in real fMRI data. A simple simulation also  
508 suggested that when there were underlying consistent components, PC1 loadings and LOO correlations  
509 were highly correlated. Therefore, the PCA-based method can provide similar information as LOO  
510 intersubject correlations.

511       There are also limitations regarding the PCA-based method. First, the baseline of the variance  
512 explained by the first PC is not zero (the x-intercept in Figure 9A through 9C), and is related to the  
513 number of subjects. When there are  $n$  subjects, imagine if the first PC is randomly assigned as one  
514 subject's time series, it will explain  $1/n$  variance. Therefore, the variance explained by the first PC cannot  
515 be compared between different sample sizes. Second, statistical testing for the PCA related parameters  
516 are not straightforward. In the current study, we adopted randomization-based nonparametric methods,  
517 which are time-consuming.

518       A more general challenge in studying naturalistic stimuli is the interpretations of the observed  
519 consistent responses. It becomes more difficult when multiple consistent responses are identified. In the  
520 current data, we found that delays of the signals may explain the differences between the two PCs. There  
521 may be other factors that could contribute to the differences. Future study may need to formulate testable  
522 hypotheses regarding the brain responses in different age groups to examine the causes of the differences  
523 further. More generally, when there are multiple consistent responses, reverse correlation technique  
524 (Hasson et al., 2004; Richardson et al., 2018) could be used to identify the events represented in different  
525 consistent responses. Advanced encoding models may also be helpful to explain the underlying coding of  
526 different consistent responses (Bartels et al., 2008; Nishimoto et al., 2011). But it could be difficult when  
527 the effects of interest are higher-order social processes such as theory of mind. Secondly, studies have  
528 shown that the shared responses are dynamic (Di and Biswal, 2020; Simony et al., 2016). The presence  
529 of multiple response components and their relations may also be sensitive to the movie context, thus  
530 showing fluctuations. For example, delays in responses may only occur to certain events, but not  
531 throughout the whole time series. Further studies may take dynamics into account to fully characterize

532 the individual differences in responses. Lastly, the current study is limited by the sample size and scan  
533 time of each subject. Further study is needed with larger sample size and longer scan time to evaluate the  
534 generalizability and reliability of the current findings.

535

536

## 537 **5. Conclusion**

538 When watching movies, the brain may respond similarly or idiosyncratically across individuals. It is also  
539 possible that multiple consistent responses exist in different subgroups, which is overlooked by the  
540 currently available methods. We proposed a PCA-based approach to analyze the individual differences in  
541 response to naturalistic stimuli, which can detect the potential multiple consistent responses. With an  
542 example movie watching data of children and young adults, we showed evidence of two consistent  
543 responses in many brain regions, one more weighted in the adults and the other more weighted in younger  
544 children. The results highlight the importance of identifying multiple consistent components when  
545 studying shared responses to naturalistic stimuli. And PCA could be a complementary approach to  
546 analyze naturalistic stimuli data.

547

548

## 549 **References:**

- 550 Bacha-Trams, M., Alexandrov, Y.I., Broman, E., Glerean, E., Kauppila, M., Kauttonen, J., Ryyppö, E.,  
551 Sams, M., Jääskeläinen, I.P., 2018. A drama movie activates brains of holistic and analytical  
552 thinkers differentially. *Soc. Cogn. Affect. Neurosci.* 13, 1293–1304.  
553 <https://doi.org/10.1093/scan/nsy099>
- 554 Bartels, A., Zeki, S., Logothetis, N.K., 2008. Natural Vision Reveals Regional Specialization to Local  
555 Motion and to Contrast-Invariant, Global Flow in the Human Brain. *Cereb. Cortex* 18, 705–717.  
556 <https://doi.org/10.1093/cercor/bhm107>
- 557 Bruneau, E.G., Jacoby, N., Saxe, R., 2015. Empathic control through coordinated interaction of amygdala,  
558 theory of mind and extended pain matrix brain regions. *NeuroImage* 114, 105–119.  
559 <https://doi.org/10.1016/j.neuroimage.2015.04.034>
- 560 Byrge, L., Dubois, J., Tyszka, J.M., Adolphs, R., Kennedy, D.P., 2015. Idiosyncratic Brain Activation  
561 Patterns Are Associated with Poor Social Comprehension in Autism. *J. Neurosci.* 35, 5837–5850.  
562 <https://doi.org/10.1523/JNEUROSCI.5182-14.2015>
- 563 Calhoun, V.D., Adali, T., Pearlson, G.D., Pekar, J.J., 2001. A method for making group inferences from  
564 functional MRI data using independent component analysis. *Hum. Brain Mapp.* 14, 140–51.

- 565 Campbell, K.L., Shafto, M.A., Wright, P., Tsvetanov, K.A., Geerligs, L., Cusack, R., Tyler, L.K., 2015.  
566 Idiosyncratic responding during movie-watching predicted by age differences in attentional  
567 control. *Neurobiol. Aging* 36, 3045–3055. <https://doi.org/10.1016/j.neurobiolaging.2015.07.028>
- 568 Cantlon, J.F., Li, R., 2013. Neural Activity during Natural Viewing of Sesame Street Statistically Predicts  
569 Test Scores in Early Childhood. *PLOS Biol.* 11, e1001462.  
570 <https://doi.org/10.1371/journal.pbio.1001462>
- 571 Chen, G., Shin, Y.-W., Taylor, P.A., Glen, D.R., Reynolds, R.C., Israel, R.B., Cox, R.W., 2016.  
572 Untangling the relatedness among correlations, part I: Nonparametric approaches to inter-subject  
573 correlation analysis at the group level. *NeuroImage* 142, 248–259.  
574 <https://doi.org/10.1016/j.neuroimage.2016.05.023>
- 575 Chen, G., Taylor, P.A., Shin, Y.-W., Reynolds, R.C., Cox, R.W., 2017. Untangling the relatedness among  
576 correlations, Part II: Inter-subject correlation group analysis through linear mixed-effects  
577 modeling. *NeuroImage* 147, 825–840. <https://doi.org/10.1016/j.neuroimage.2016.08.029>
- 578 Dean, R.T., Dunsmuir, W.T.M., 2016. Dangers and uses of cross-correlation in analyzing time series in  
579 perception, performance, movement, and neuroscience: The importance of constructing transfer  
580 function autoregressive models. *Behav. Res. Methods* 48, 783–802.  
581 <https://doi.org/10.3758/s13428-015-0611-2>
- 582 Di, X., Biswal, B.B., 2020. Intersubject consistent dynamic connectivity during natural vision revealed by  
583 functional MRI. *NeuroImage* 116698. <https://doi.org/10.1016/j.neuroimage.2020.116698>
- 584 Di, X., Biswal, B.B., 2015. Characterizations of resting-state modulatory interactions in the human brain.  
585 *J. Neurophysiol.* 114, 2785–96. <https://doi.org/10.1152/jn.00893.2014>
- 586 Dosenbach, N.U.F., Nardos, B., Cohen, A.L., Fair, D.A., Power, J.D., Church, J.A., Nelson, S.M., Wig,  
587 G.S., Vogel, A.C., Lessov-Schlaggar, C.N., Barnes, K.A., Dubis, J.W., Feczko, E., Coalson, R.S.,  
588 Pruett, J.R., Barch, D.M., Petersen, S.E., Schlaggar, B.L., 2010. Prediction of individual brain  
589 maturity using fMRI. *Science* 329, 1358–61. <https://doi.org/10.1126/science.1194144>
- 590 Finn, E.S., Corlett, P.R., Chen, G., Bandettini, P.A., Constable, R.T., 2018. Trait paranoia shapes inter-  
591 subject synchrony in brain activity during an ambiguous social narrative. *Nat. Commun.* 9, 2043.  
592 <https://doi.org/10.1038/s41467-018-04387-2>
- 593 Finn, E.S., Glerean, E., Khojandi, A.Y., Nielson, D., Molfese, P.J., Handwerker, D.A., Bandettini, P.A.,  
594 2020. Idiosynchrony: From shared responses to individual differences during naturalistic  
595 neuroimaging. *NeuroImage* 116828. <https://doi.org/10.1016/j.neuroimage.2020.116828>
- 596 Friston, K.J., Jezzard, P., Turner, R., 1994. Analysis of functional MRI time-series. *Hum. Brain Mapp.* 1,  
597 153–171. <https://doi.org/10.1002/hbm.460010207>
- 598 Friston, K.J., Josephs, O., Zarahn, E., Holmes, A.P., Rouquette, S., Poline, J.-B., 2000. To Smooth or Not  
599 to Smooth?: Bias and Efficiency in fMRI Time-Series Analysis. *NeuroImage* 12, 196–208.  
600 <https://doi.org/10.1006/nimg.2000.0609>
- 601 Friston, K.J., Williams, S., Howard, R., Frackowiak, R.S., Turner, R., 1996. Movement-related effects in  
602 fMRI time-series. *Magn. Reson. Med. Off. J. Soc. Magn. Reson. Med. Soc. Magn. Reson. Med.*  
603 35, 346–55. <https://doi.org/DOI 10.1002/mrm.1910350312>
- 604 Han, S., Jiang, Y., Humphreys, G.W., 2007. Watching cartoons activates the medial prefrontal cortex in  
605 children. *Chin. Sci. Bull.* 52, 3371–3375. <https://doi.org/10.1007/s11434-007-0505-5>
- 606 Han, S., Jiang, Y., Humphreys, G.W., Zhou, T., Cai, P., 2005. Distinct neural substrates for the perception  
607 of real and virtual visual worlds. *NeuroImage* 24, 928–935.  
608 <https://doi.org/10.1016/j.neuroimage.2004.09.046>
- 609 Hasson, U., Avidan, G., Gelbard, H., Vallines, I., Harel, M., Minshew, N., Behrmann, M., 2009. Shared  
610 and idiosyncratic cortical activation patterns in autism revealed under continuous real-life  
611 viewing conditions. *Autism Res.* 2, 220–231. <https://doi.org/10.1002/aur.89>
- 612 Hasson, U., Nir, Y., Levy, I., Fuhrmann, G., Malach, R., 2004. Intersubject synchronization of cortical  
613 activity during natural vision. *Science* 303, 1634–40. <https://doi.org/10.1126/science.1089506>

- 614 Jääskeläinen, I.P., Pajula, J., Tohka, J., Lee, H.-J., Kuo, W.-J., Lin, F.-H., 2016. Brain hemodynamic  
615 activity during viewing and re-viewing of comedy movies explained by experienced humor. *Sci.*  
616 *Rep.* 6, 27741. <https://doi.org/10.1038/srep27741>
- 617 Kauppi, J.-P., Jääskeläinen, I.P., Sams, M., Tohka, J., 2010. Inter-subject correlation of brain  
618 hemodynamic responses during watching a movie: localization in space and frequency. *Front.*  
619 *Neuroinformatics* 4. <https://doi.org/10.3389/fninf.2010.00005>
- 620 Lenroot, R.K., Gogtay, N., Greenstein, D.K., Wells, E.M., Wallace, G.L., Clasen, L.S., Blumenthal, J.D.,  
621 Lerch, J., Zijdenbos, A.P., Evans, A.C., Thompson, P.M., Giedd, J.N., 2007. Sexual dimorphism  
622 of brain developmental trajectories during childhood and adolescence. *NeuroImage* 36, 1065–  
623 1073. <https://doi.org/10.1016/j.neuroimage.2007.03.053>
- 624 Moraczewski, D., Chen, G., Redcay, E., 2018. Inter-subject synchrony as an index of functional  
625 specialization in early childhood. *Sci. Rep.* 8, 2252. <https://doi.org/10.1038/s41598-018-20600-0>
- 626 Nastase, S.A., Gazzola, V., Hasson, U., Keysers, C., 2019. Measuring shared responses across subjects  
627 using intersubject correlation. *Soc. Cogn. Affect. Neurosci.* 14, 667–685.  
628 <https://doi.org/10.1093/scan/nsz037>
- 629 Nishimoto, S., Vu, A.T., Naselaris, T., Benjamini, Y., Yu, B., Gallant, J.L., 2011. Reconstructing Visual  
630 Experiences from Brain Activity Evoked by Natural Movies. *Curr. Biol.* 21, 1641–1646.  
631 <https://doi.org/10.1016/j.cub.2011.08.031>
- 632 Nummenmaa, L., Glerean, E., Viinikainen, M., Jääskeläinen, I.P., Hari, R., Sams, M., 2012. Emotions  
633 promote social interaction by synchronizing brain activity across individuals. *Proc. Natl. Acad.*  
634 *Sci. U. S. A.* 109, 9599–9604. <https://doi.org/10.1073/pnas.1206095109>
- 635 Petroni, A., Cohen, S.S., Ai, L., Langer, N., Henin, S., Vanderwal, T., Milham, M.P., Parra, L.C., 2018.  
636 The Variability of Neural Responses to Naturalistic Videos Change with Age and Sex. *eNeuro* 5.  
637 <https://doi.org/10.1523/ENEURO.0244-17.2017>
- 638 Richardson, H., Lisandrelli, G., Riobueno-Naylor, A., Saxe, R., 2018. Development of the social brain  
639 from age three to twelve years. *Nat. Commun.* 9, 1–12. [https://doi.org/10.1038/s41467-018-](https://doi.org/10.1038/s41467-018-03399-2)  
640 [03399-2](https://doi.org/10.1038/s41467-018-03399-2)
- 641 Richardson, H., Saxe, R., 2020. Development of predictive responses in theory of mind brain regions.  
642 *Dev. Sci.* 23, e12863. <https://doi.org/10.1111/desc.12863>
- 643 Salmi, J., Roine, U., Glerean, E., Lahnakoski, J., Nieminen-von Wendt, T., Tani, P., Leppämäki, S.,  
644 Nummenmaa, L., Jääskeläinen, I.P., Carlson, S., Rintahaka, P., Sams, M., 2013. The brains of  
645 high functioning autistic individuals do not synchronize with those of others. *NeuroImage Clin.* 3,  
646 489–497. <https://doi.org/10.1016/j.nicl.2013.10.011>
- 647 Schaefer, A., Kong, R., Gordon, E.M., Laumann, T.O., Zuo, X.-N., Holmes, A.J., Eickhoff, S.B., Yeo,  
648 B.T.T., 2018. Local-Global Parcellation of the Human Cerebral Cortex from Intrinsic Functional  
649 Connectivity MRI. *Cereb. Cortex N. Y. N* 1991 28, 3095–3114.  
650 <https://doi.org/10.1093/cercor/bhx179>
- 651 Silani, G., Lamm, C., Ruff, C.C., Singer, T., 2013. Right Supramarginal Gyrus Is Crucial to Overcome  
652 Emotional Egocentricity Bias in Social Judgments. *J. Neurosci.* 33, 15466–15476.  
653 <https://doi.org/10.1523/JNEUROSCI.1488-13.2013>
- 654 Simony, E., Honey, C.J., Chen, J., Lositsky, O., Yeshurun, Y., Wiesel, A., Hasson, U., 2016. Dynamic  
655 reconfiguration of the default mode network during narrative comprehension. *Nat. Commun.* 7,  
656 12141. <https://doi.org/10.1038/ncomms12141>
- 657 Sonkusare, S., Breakspear, M., Guo, C., 2019. Naturalistic Stimuli in Neuroscience: Critically Acclaimed.  
658 *Trends Cogn. Sci.* 23, 699–714. <https://doi.org/10.1016/j.tics.2019.05.004>
- 659 Xia, M., Wang, J., He, Y., 2013. BrainNet Viewer: a network visualization tool for human brain  
660 connectomics. *PloS One* 8, e68910. <https://doi.org/10.1371/journal.pone.0068910>
- 661 Yang, Z., Wu, J., Xu, L., Deng, Z., Tang, Y., Gao, J., Hu, Y., Zhang, Y., Qin, S., Li, C., Wang, J., 2019.  
662 Individualized psychiatric imaging based on inter-subject neural synchronization in movie  
663 watching. *NeuroImage* 116227. <https://doi.org/10.1016/j.neuroimage.2019.116227>  
664



665

666

## 667 **Figure Legends**

668 **Figure 1** Illustrations of developmental effects of shared responses in a brain region. A and B illustrate  
669 two hypothetical developmental functions of consistent responses. The age range was set between 0 and  
670 30 years, which overlaps with the empirical data. Note that the consistent responses in A and B may be  
671 independent. C shows the scenario where the two separate consistent components are present. D through  
672 F show the pair-wise correlation matrices across subjects. G through I show the intersubject correlations  
673 calculated using the leave-one-out (LOO) method against the subjects' age. J through L show the  
674 percentage of variances explained by the first 10 principal components (PCs) from principal component  
675 analysis (PCA). M through O show the PC loadings of the first one or two PCs against age.

676

677 **Figure 2** A. Maps of 15 independent components (ICs) that are included in the current analysis. The  
678 group averaged maps were thresholded at  $z > 2.3$ . B. Percentage of variance explained by the first three  
679 principal components for the 15 networks (ICs). The bar colors correspond to the network colors in panel  
680 A. \* represents  $p < 0.001$  by using a circular time-shift randomization method. The brain networks were  
681 visualized with BrainNet Viewer (RRID: SCR\_009446) (Xia et al., 2013).

682

683 **Figure 3** A, Correlation matrix of the supramarginal gyrus network (independent component 17) across  
684 the 82 subjects. The subject were sorted by age in an ascending order. B and C, Principal component  
685 (PC) loadings for the first and second PCs as functions of age. D, Leave-one-out (LOO) intersubject  
686 correlations as a function of age. The brain slice illustrates the location of the network.

687

688 **Figure 4** A, Principal component (PC) scores of the first two PCs in the supramarginal network  
689 (independent component 17). The brain slice illustrates the location of the network. B, Cross-  
690 correlations between the first two PCs. The red lines indicate  $p < 0.05$  of absolute peak cross-

691 correlations. C, Time shifts of individual's time series with reference to the first PC score as a function of  
692 the PC2 loading.

693

694 **Figure 5** Correlations between theory of mind (ToM) performance (proportion of correct) and principal  
695 component (PC) loadings for the first two PCs of the supramarginal gyrus network (independent  
696 component 17). The brain slice illustrates the location of the network.

697

698 **Figure 6** Percentage of variance explained by the second (A) and first (B) principal components (PCs)  
699 from the voxel-wise analysis (C). The voxels in A were thresholded at  $p < 0.001$ . The voxels in B were  
700 thresholded at 9%. The brain networks were visualized with BrainNet Viewer (RRID: SCR\_009446)  
701 (Xia et al., 2013).

702

703 **Figure 7** A, the time series of the first two principal components (PC scores) for the precuneus region  
704 (depicted in the brain slice). B and C, the first and second principal component (PC) loadings as  
705 functions of age. D, the cross-correlations between the two PCs. The red lines indicate  $p < 0.05$  of  
706 absolute peak cross-correlations.

707

708 **Figure 8** A, the time series of the first two principal components (PC scores) for the left sensorimotor  
709 region (depicted in the brain slice). B and C, the first and second principal component (PC) loadings as  
710 functions of age. D, the cross-correlations between the two PCs. The red lines indicate  $p < 0.05$  of  
711 absolute peak cross-correlations.

712

713 **Figure 9** Upper row, correlations between the squared mean intersubject correlations using leave-one-out  
714 (LOO) method and the variance explained by the first principal component (PC). Lower row, the  
715 correlations between the first PC loadings and individual LOO correlations as functions of the variance  
716 explained by the first PC.

Hypothetical function

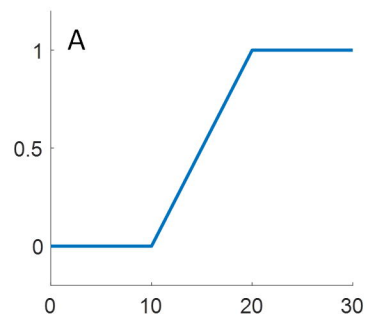

Intersubject correlations

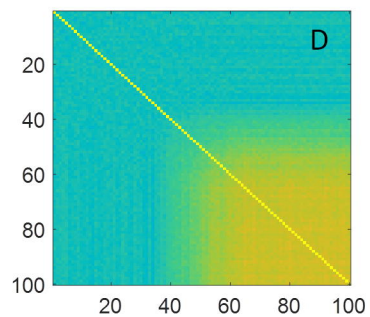

LOO correlations

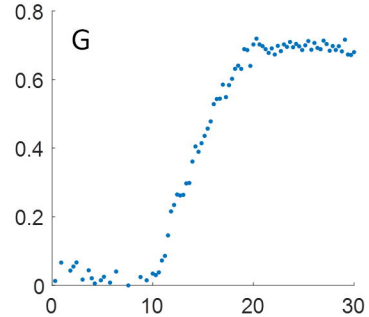

Variance explained

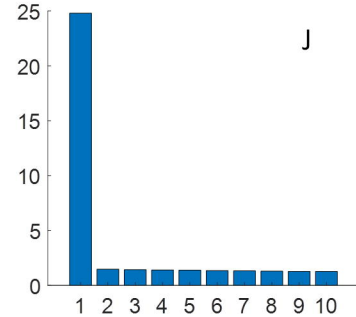

PC loadings

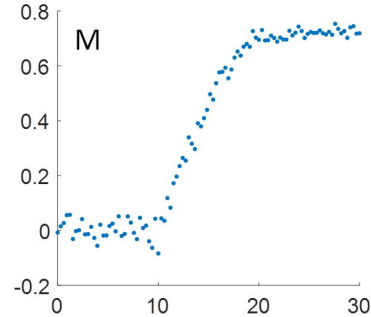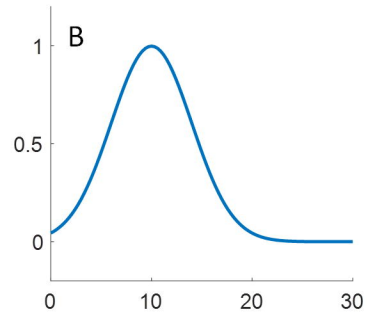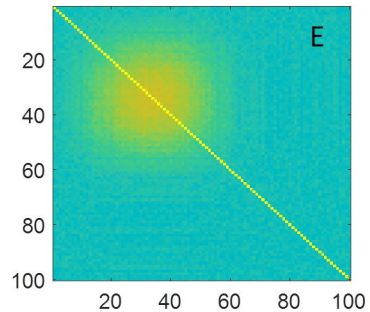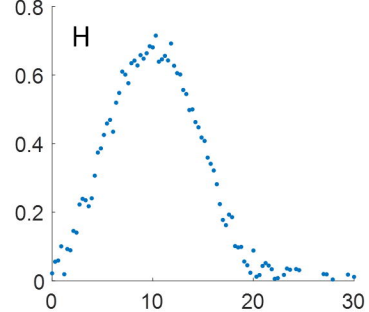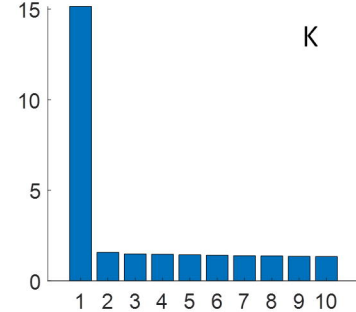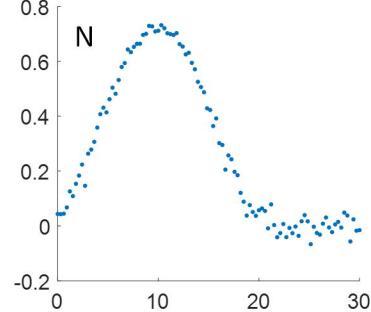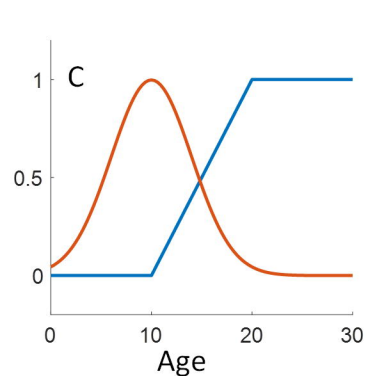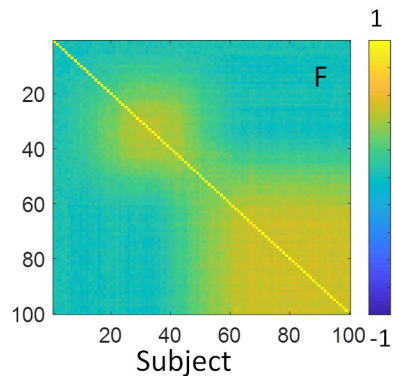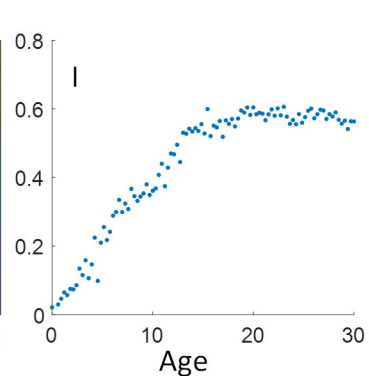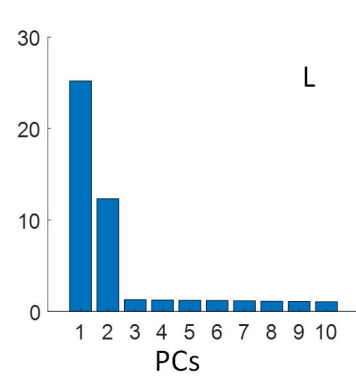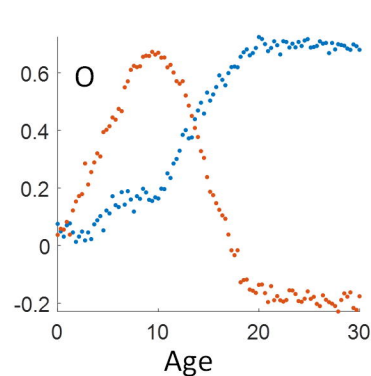

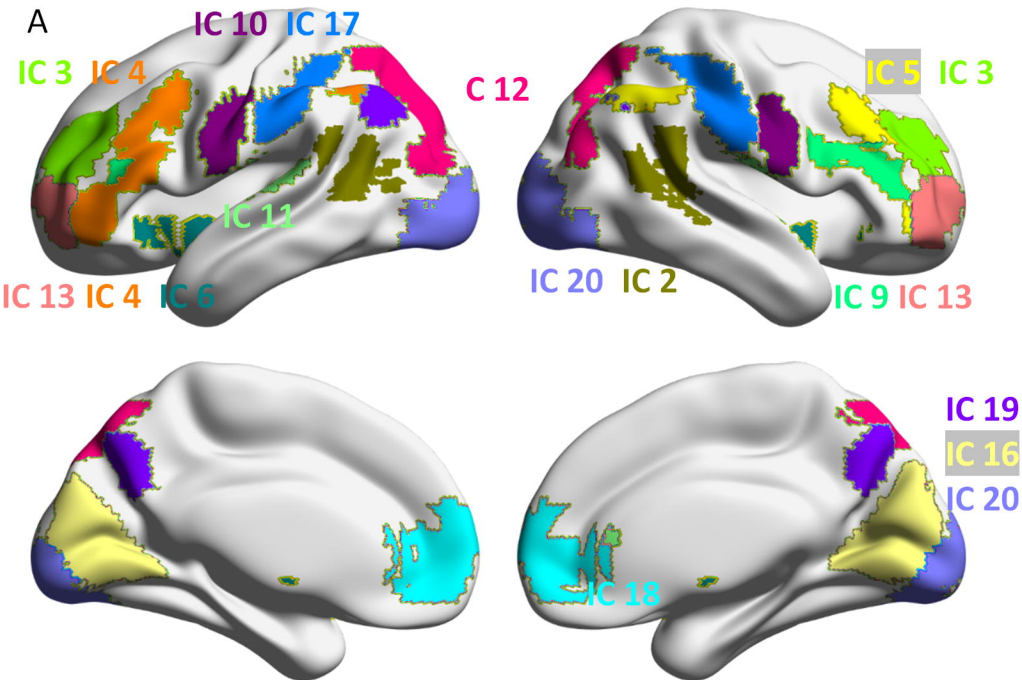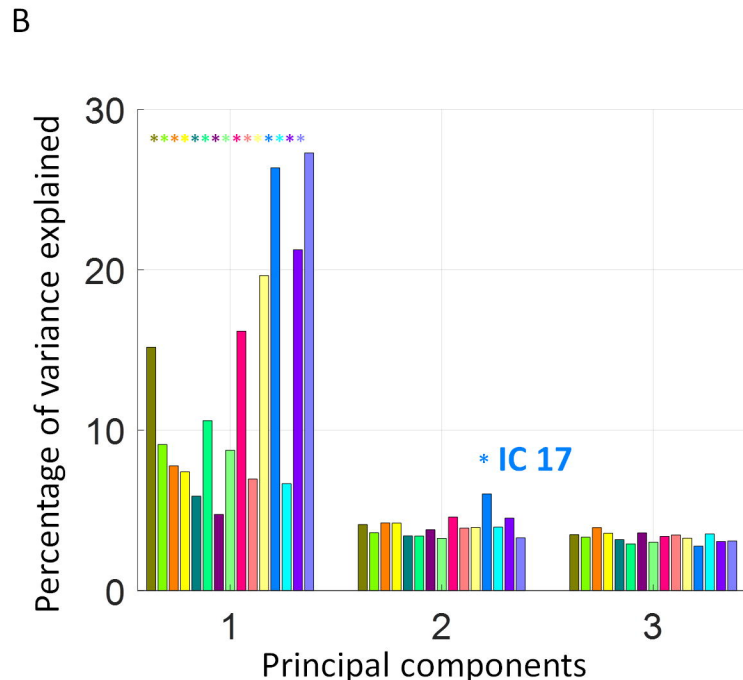

A

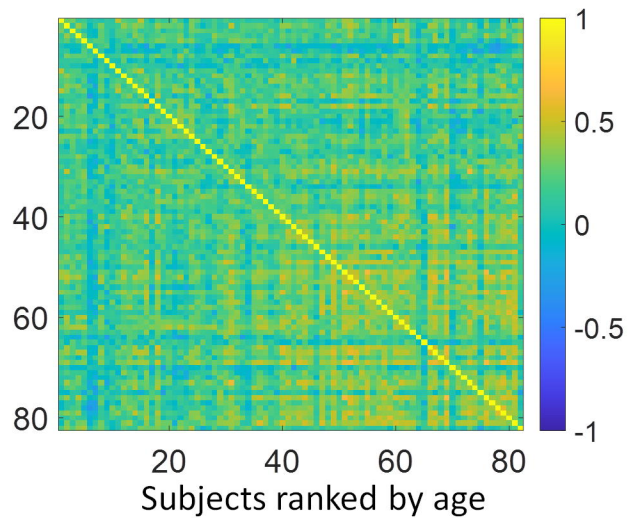

B

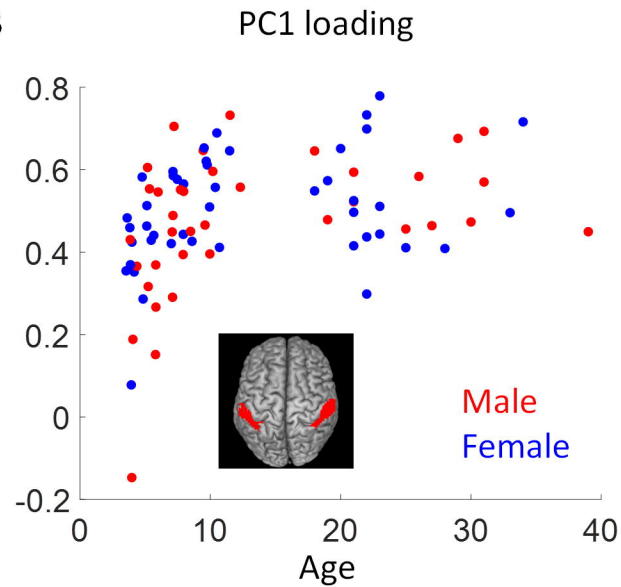

C

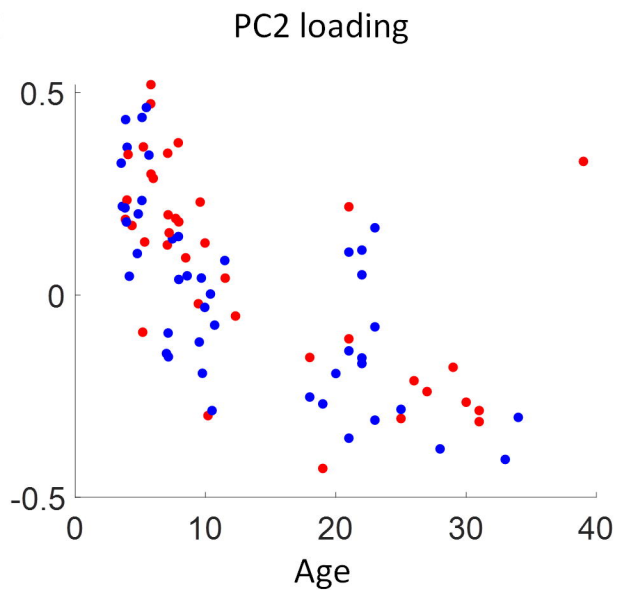

D

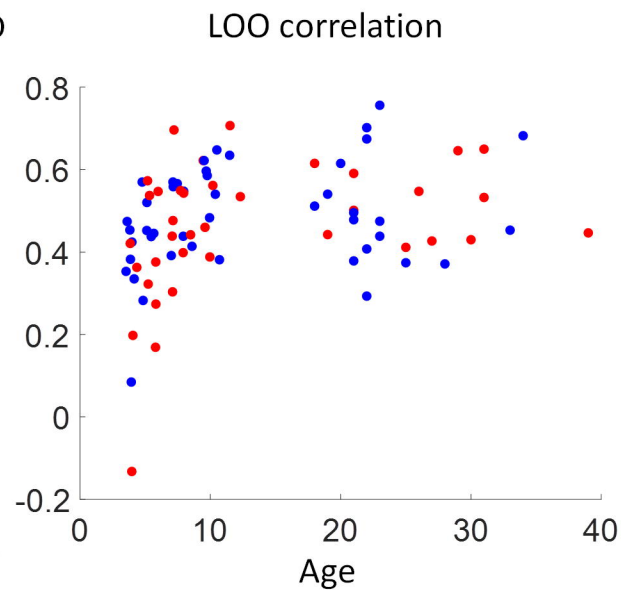

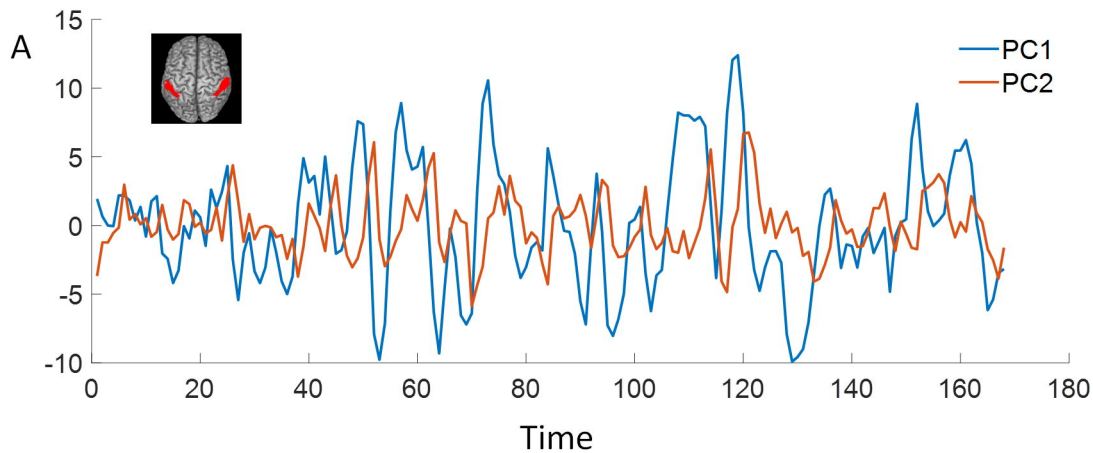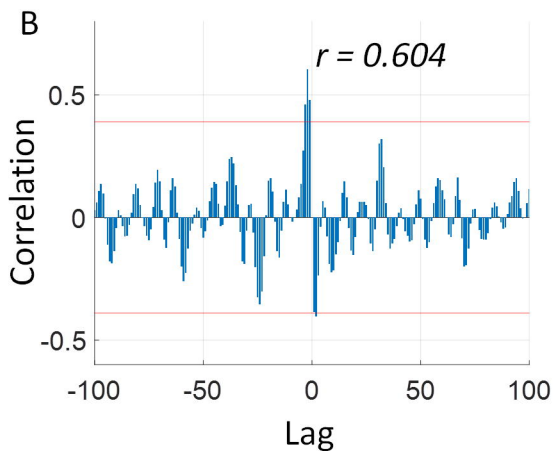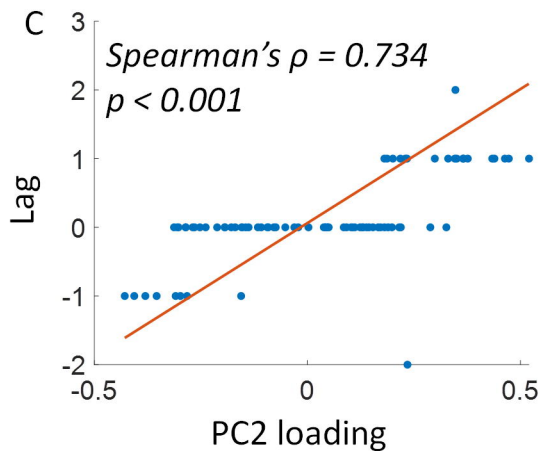

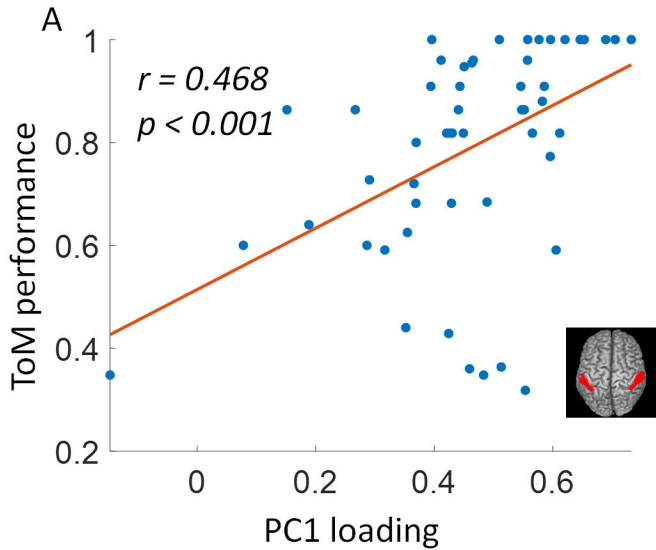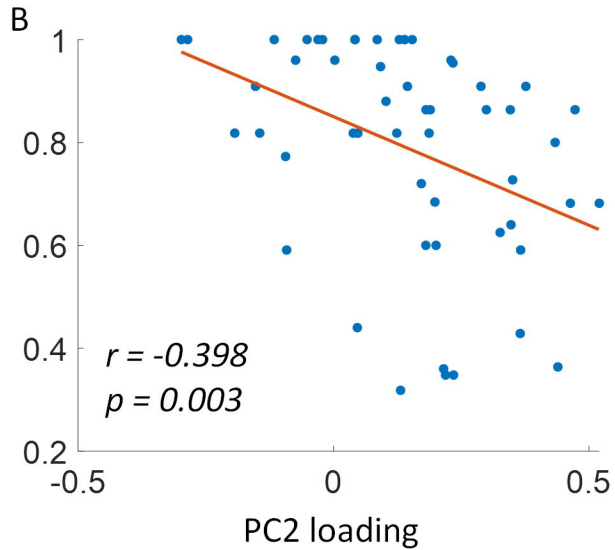

PC2

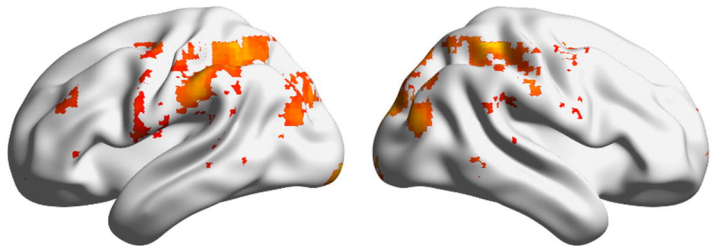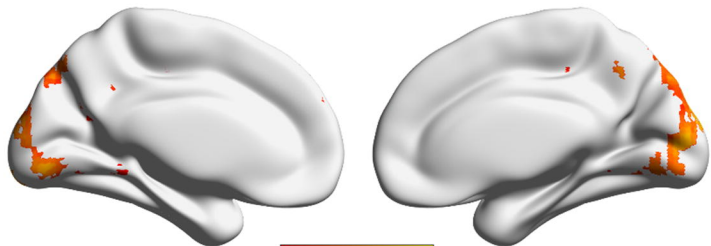

3.8

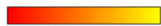

6.4

PC1

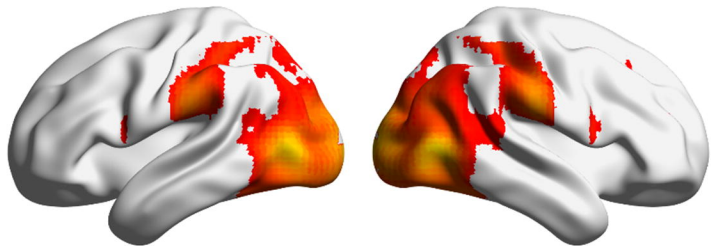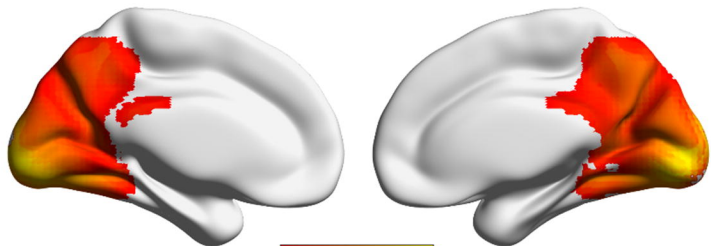

9

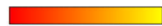

25



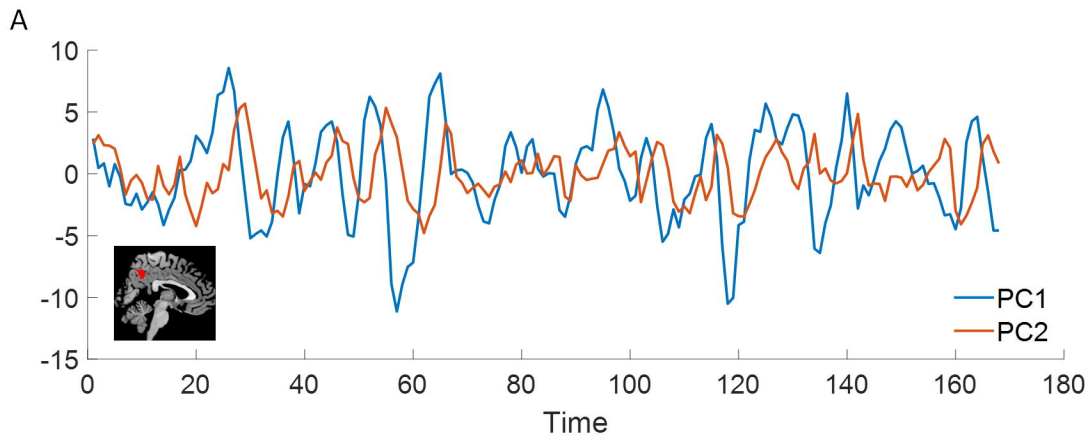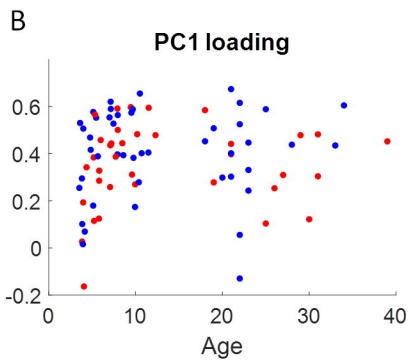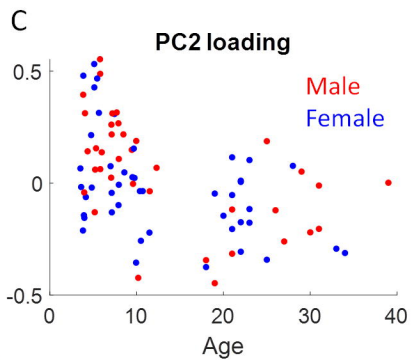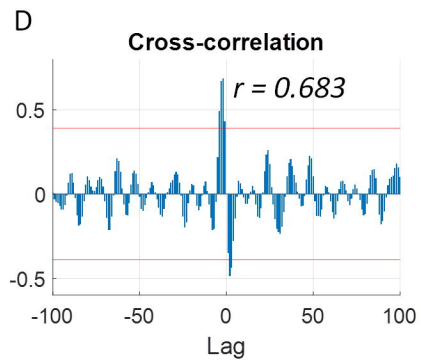

A

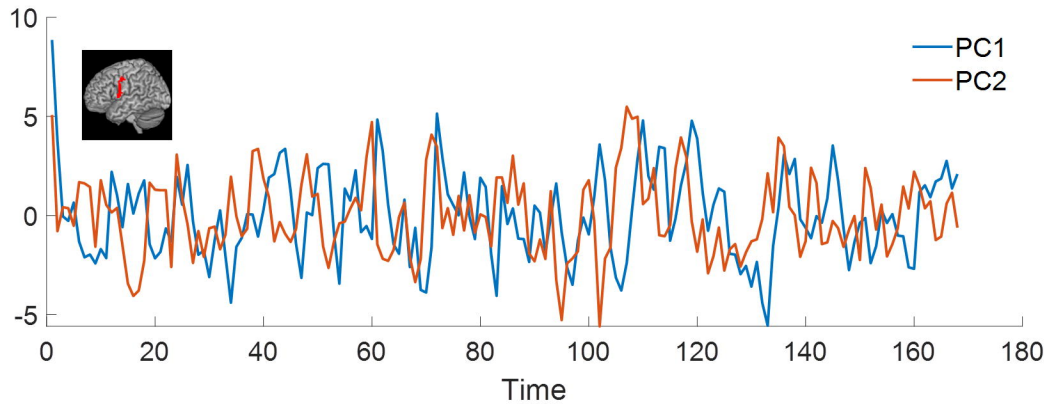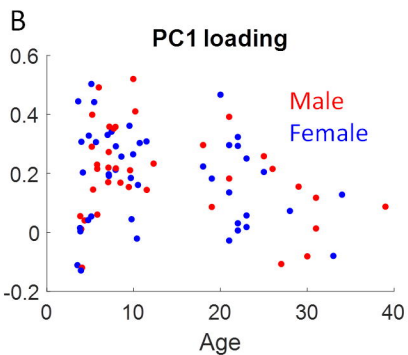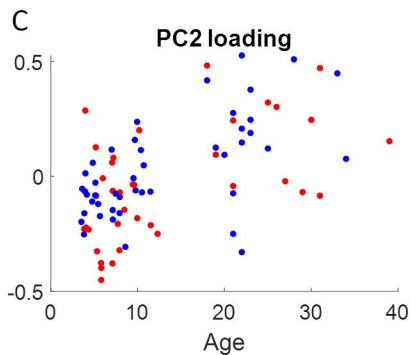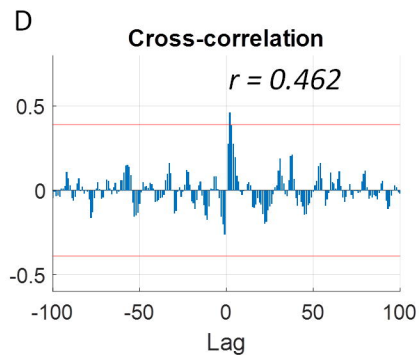

20 independent components (ICs)

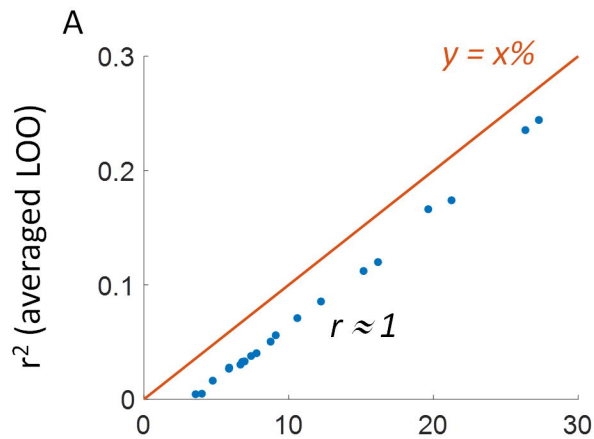

1,000 regions of interest

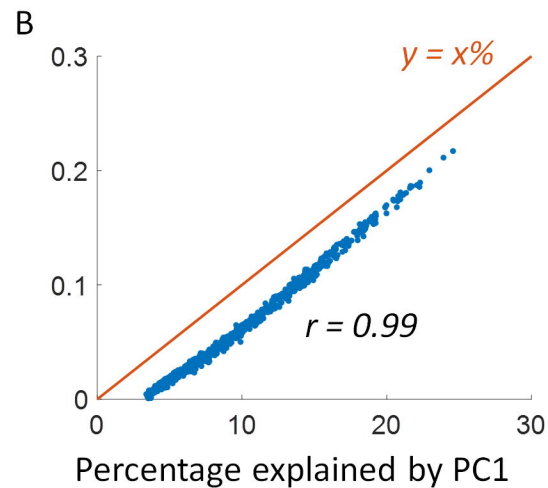

Simulation

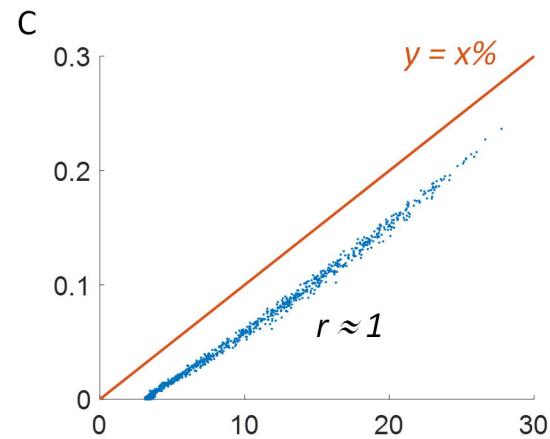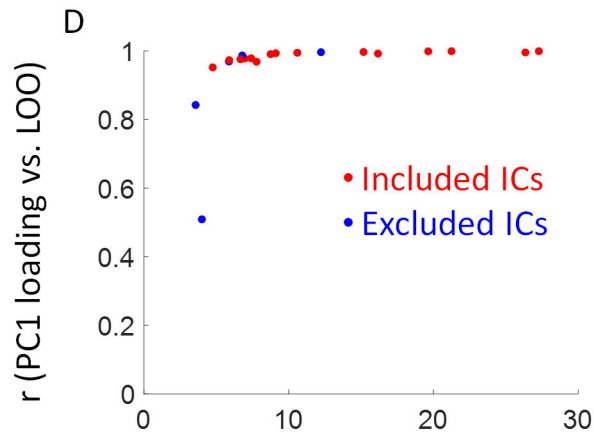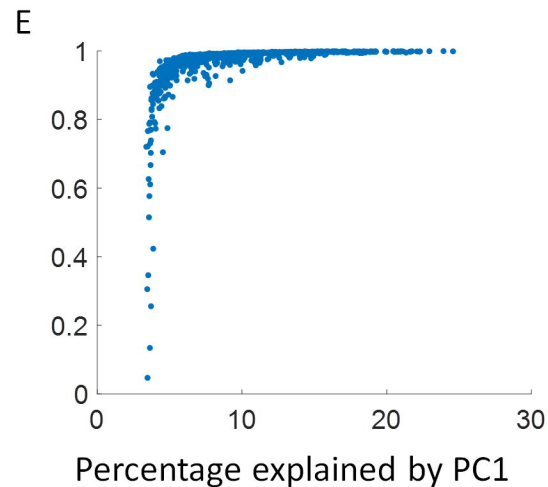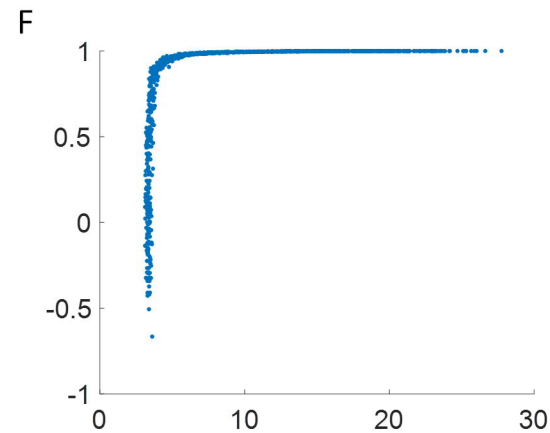

Source: https://www.biorxiv.org/content/10.1101/2020.05.01.073163v3.full.pdf
